# Supplementary material for: FACT plays a major role in histone dynamics affecting VSG expression site control in Trypanosoma brucei
Source: PubMed Central journal article supplement (PMC4625058; doi:10.1111/mmi.12812), 2014-10-22
Supplement: mmi0094-0945-sd1.pdf [file mmi0094-0945-sd1.pdf]

## Mass spectrometry of the FACT complex using Spt16 protein affinity purification

| <b>Protein</b>                 | <b>GeneID</b>  | <b>Score</b> |
|--------------------------------|----------------|--------------|
| Spt16                          | Tb927.3.5620   | 10303        |
| Hypothetical, conserved (Pob3) | Tb927.10.14390 | 5838         |
| Beta Tubulin                   | Tb927.1.2330   | 861          |
| Alpha Tubulin                  | Tb927.1.2340   | 164          |
| Histone H2A, putative          | Tb927.7.2820   | 147          |
| Histone H2B, putative          | Tb927.10.10460 | 717          |
| Histone H3, putative           | Tb927.1.2430   | 102          |
| Histone H4, putative           | Tb927.5.4170   | 438          |

**A**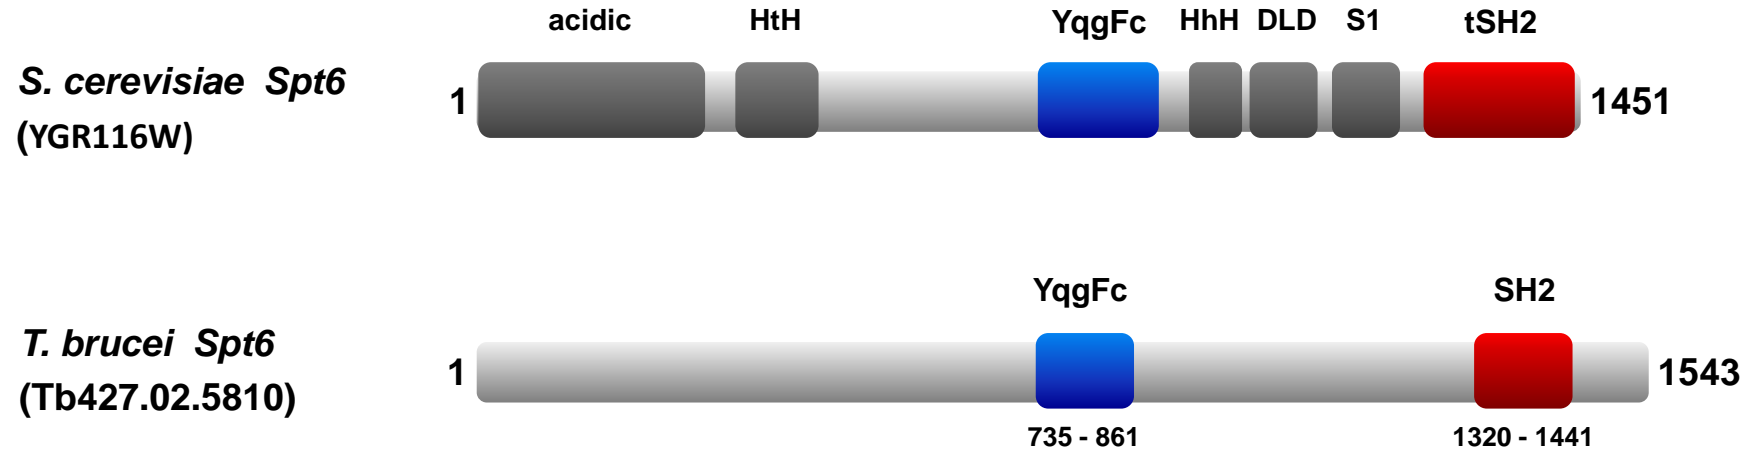**B**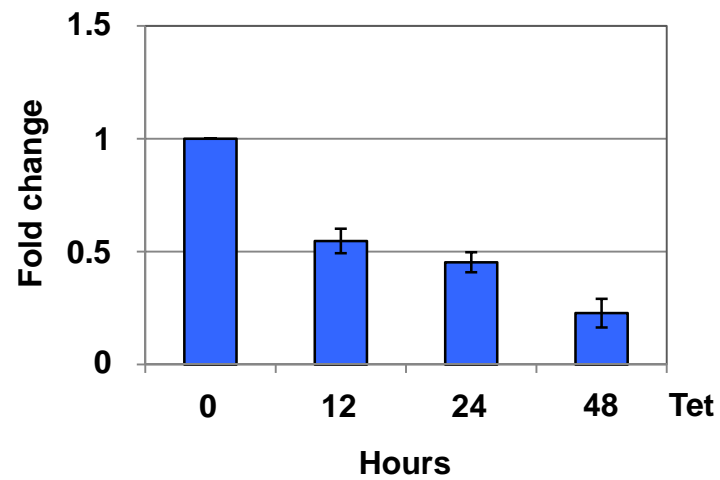**C**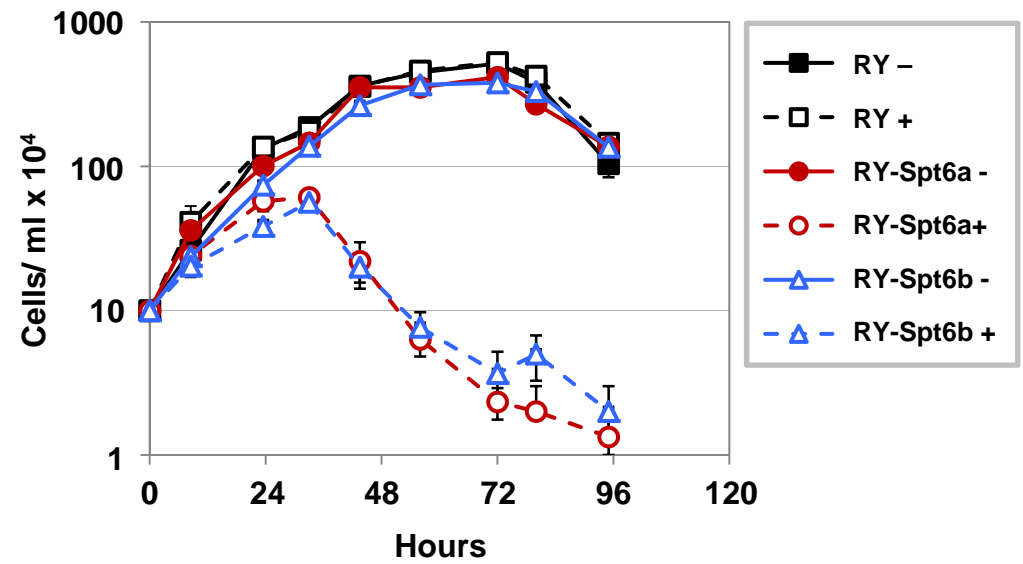**Sup Fig 2**

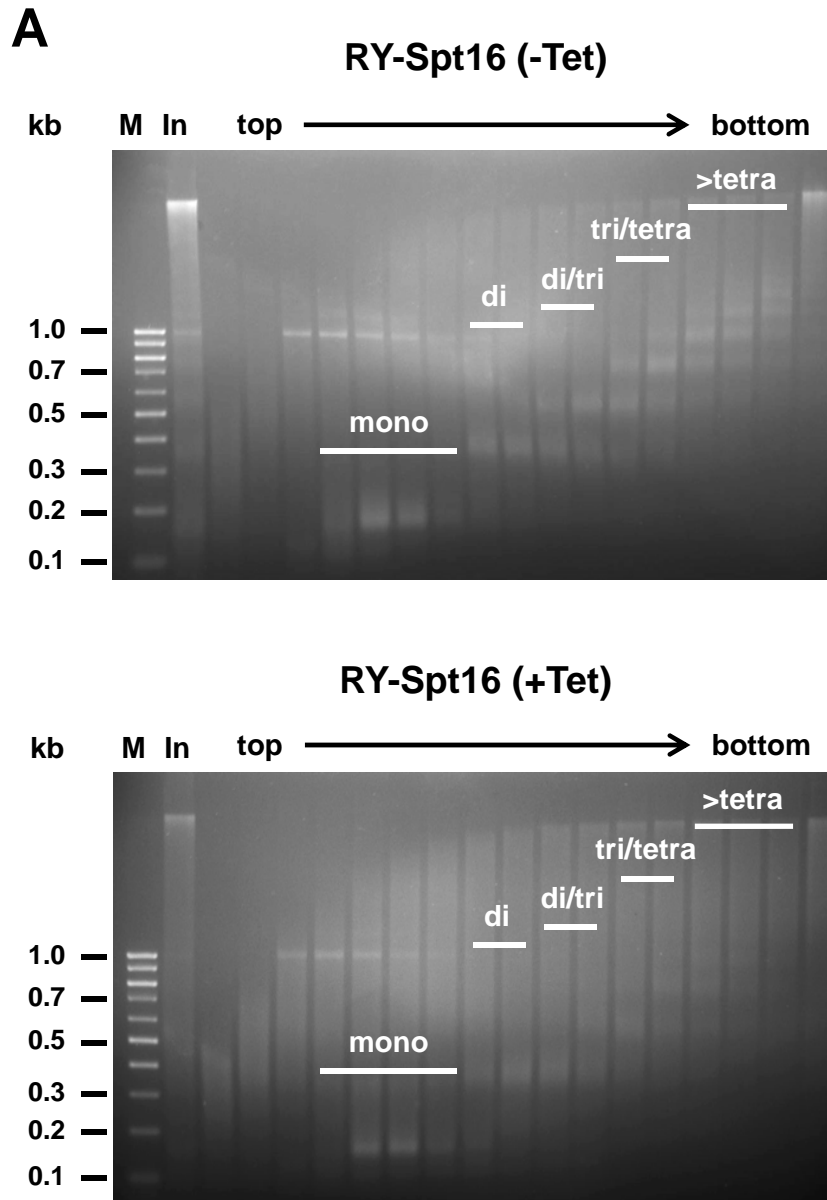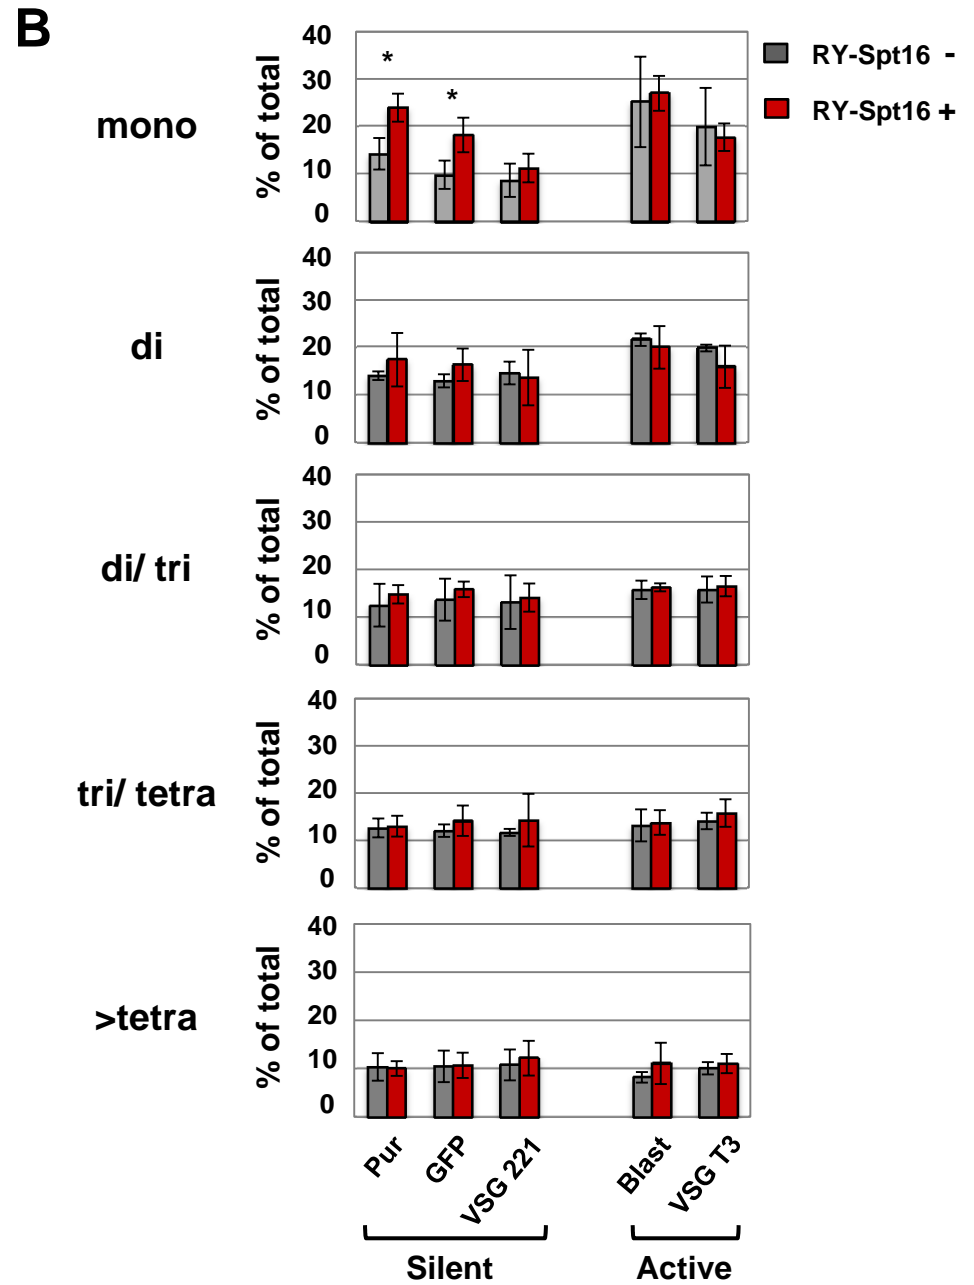

**Sup Fig 3**

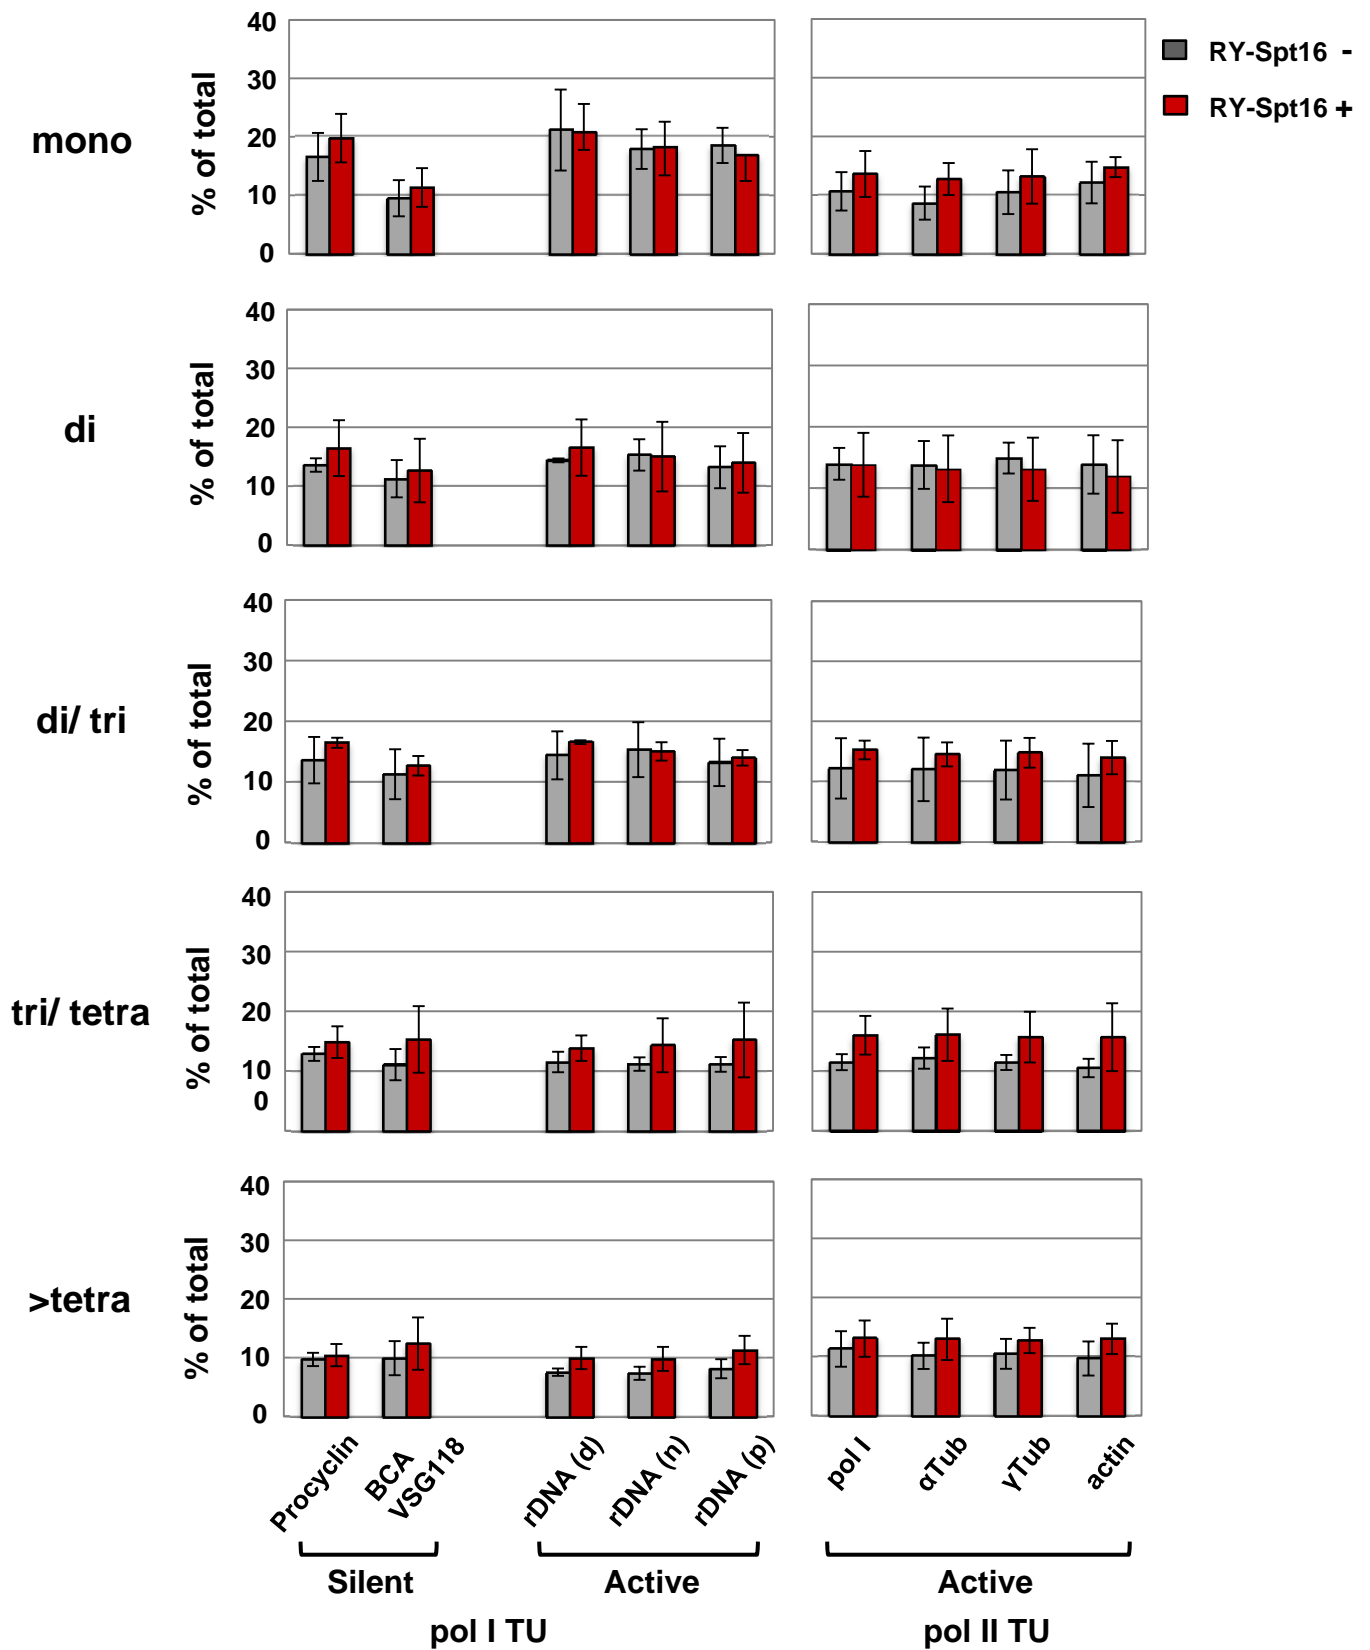

**Sup Fig 4**

**A**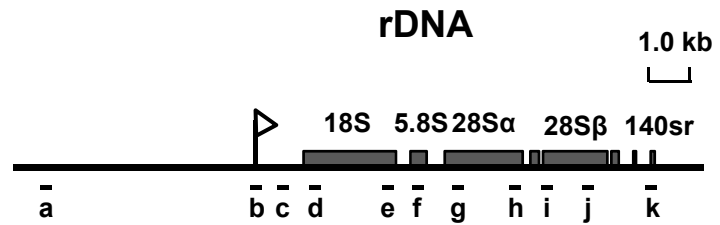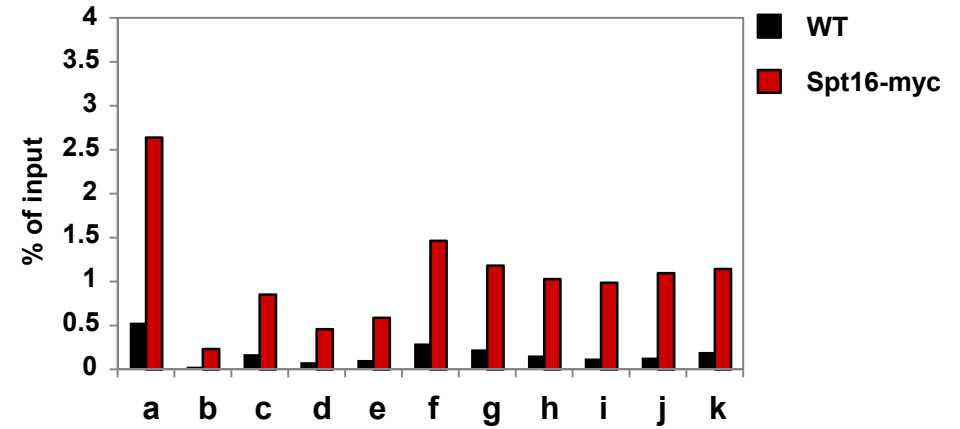**B**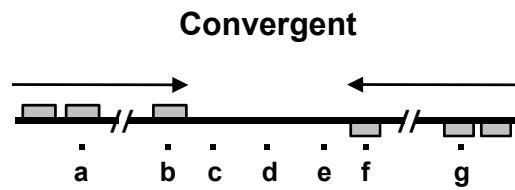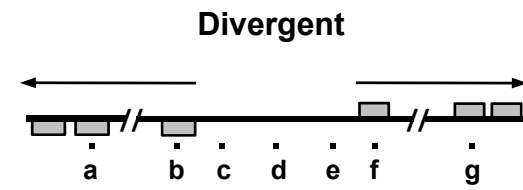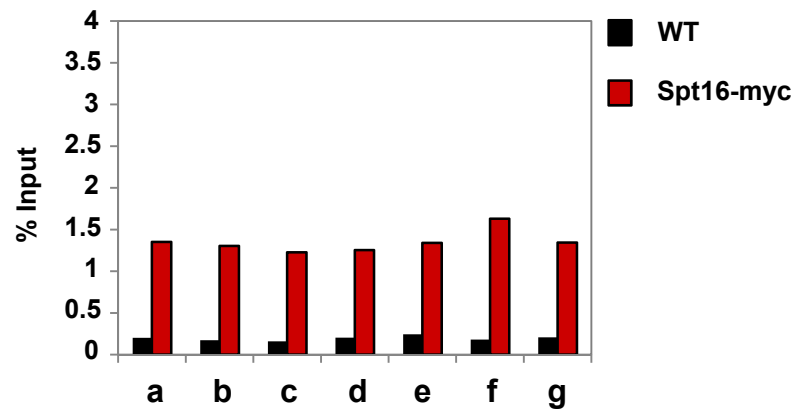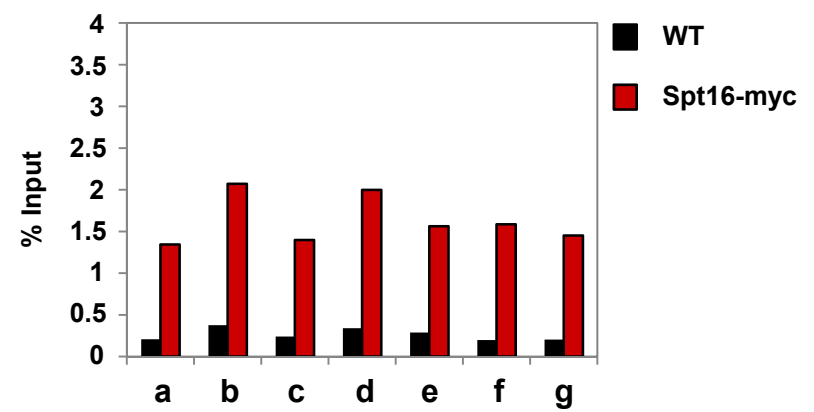

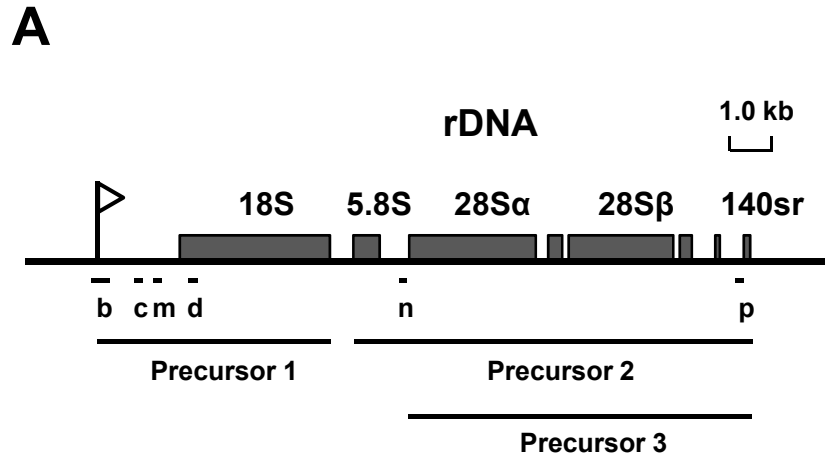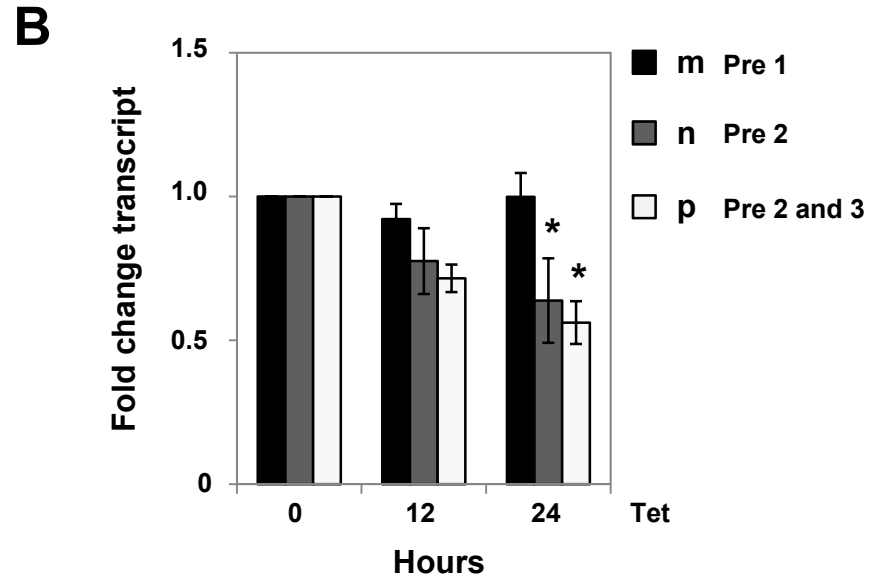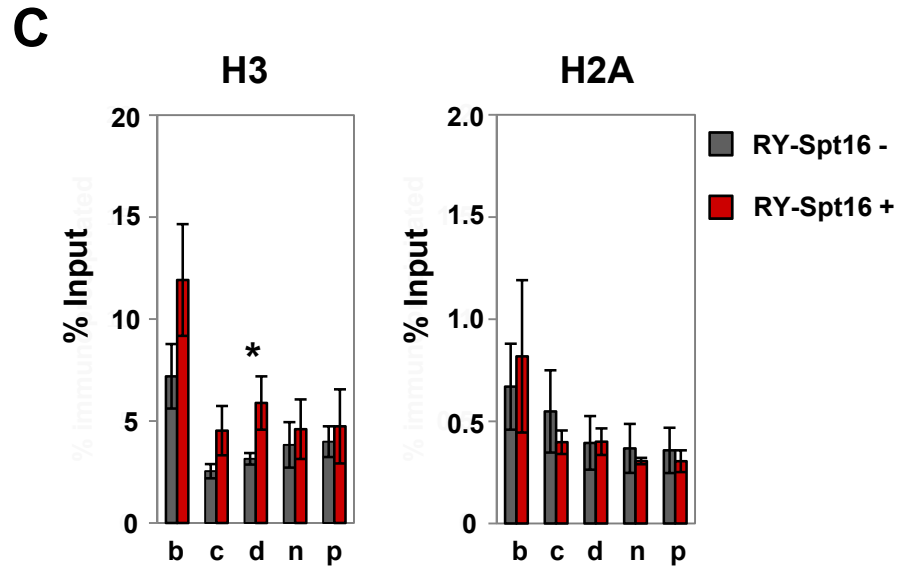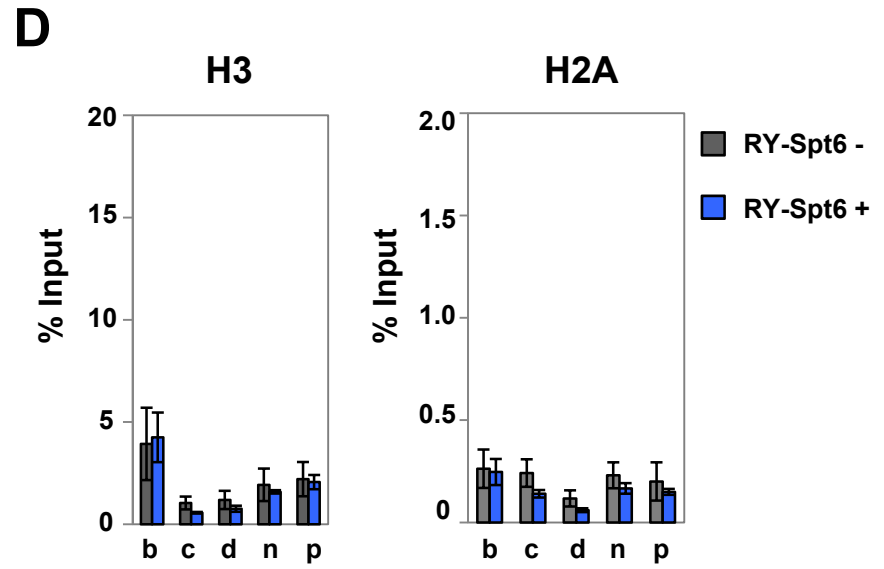

Sup Fig 6

**A**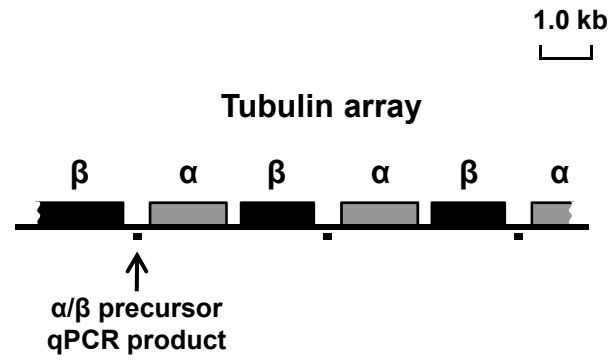**B**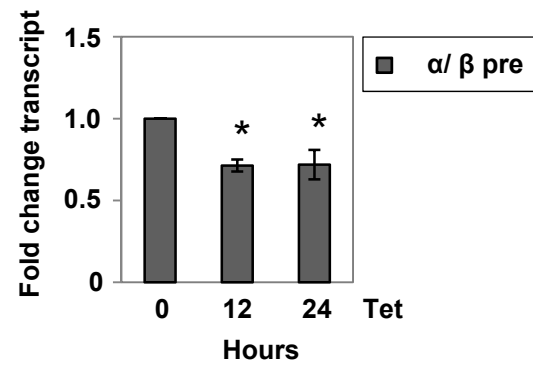**Sup Fig 7**

Spt6

Convergent

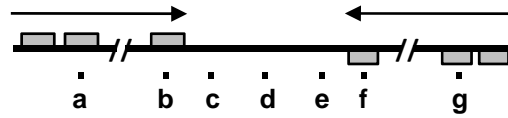

Divergent

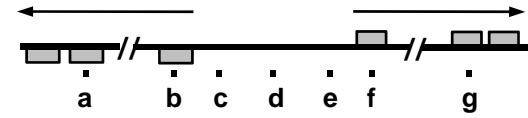

H3

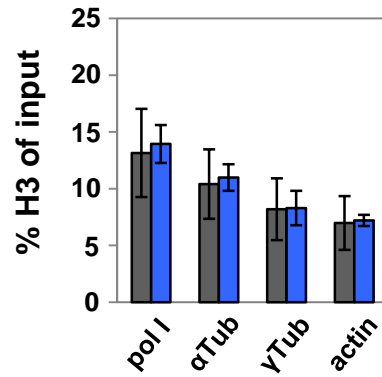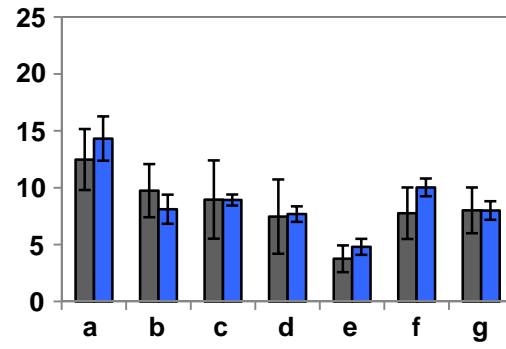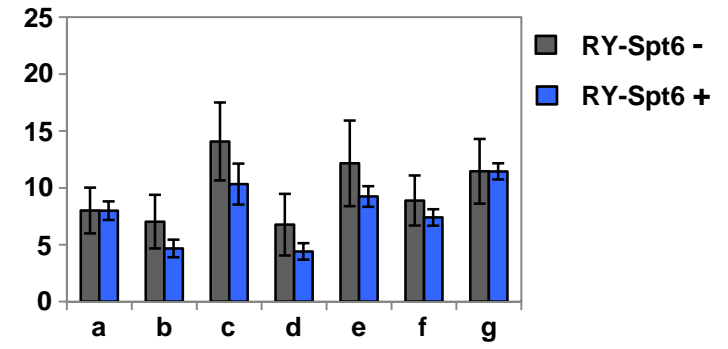

H2A

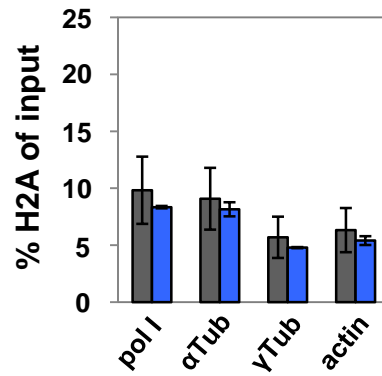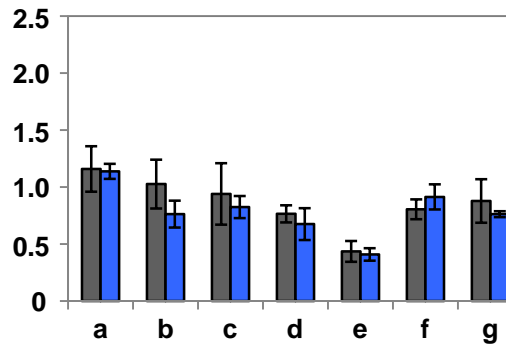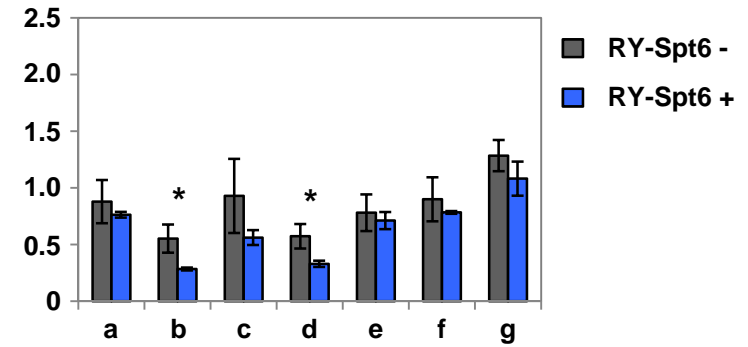

Sup Fig 8



**A**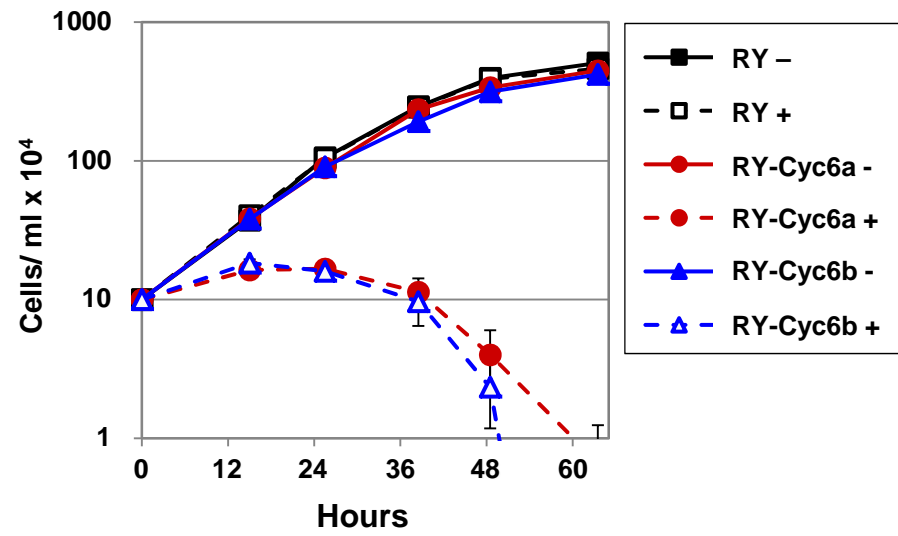**B**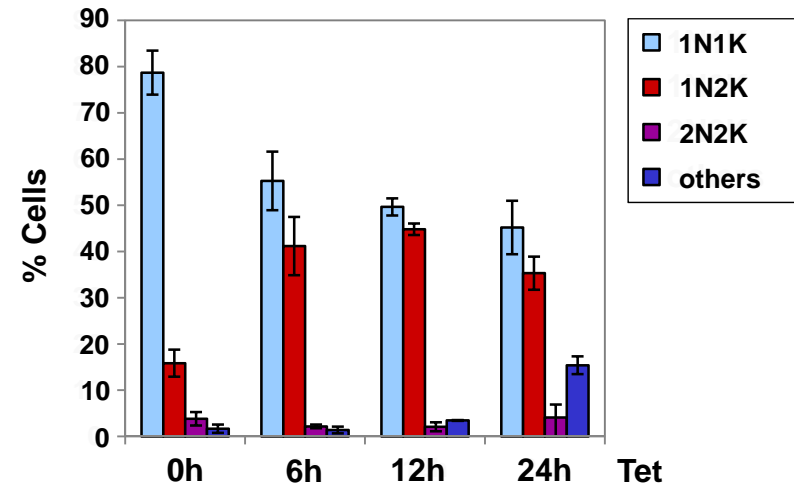**C**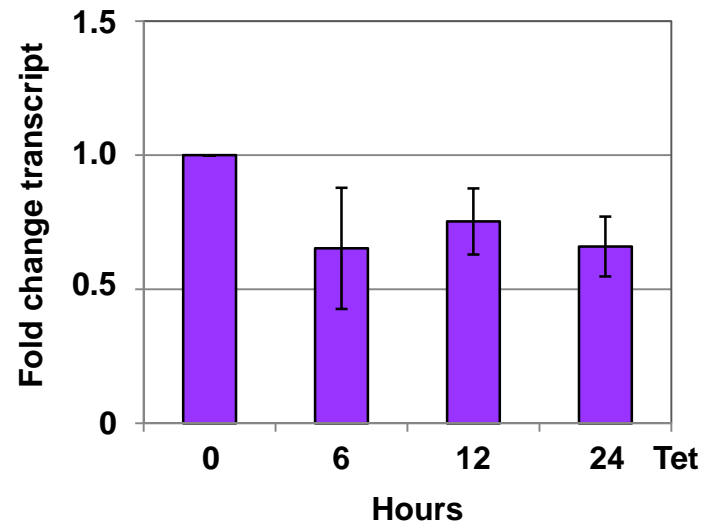**Sup Fig 9**

**A**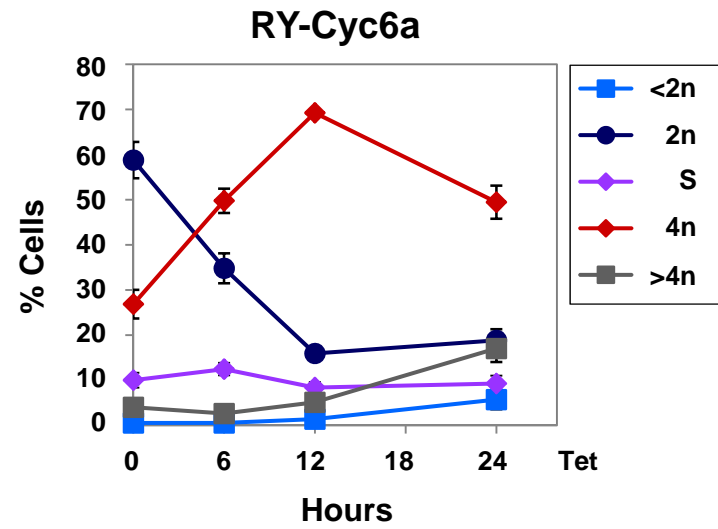**Cyc6a**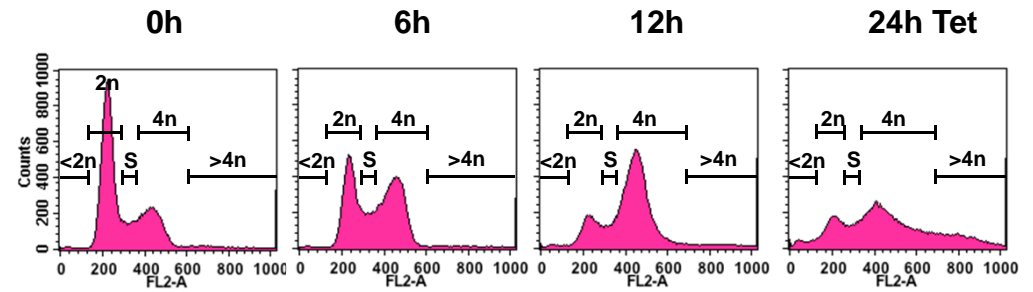**B**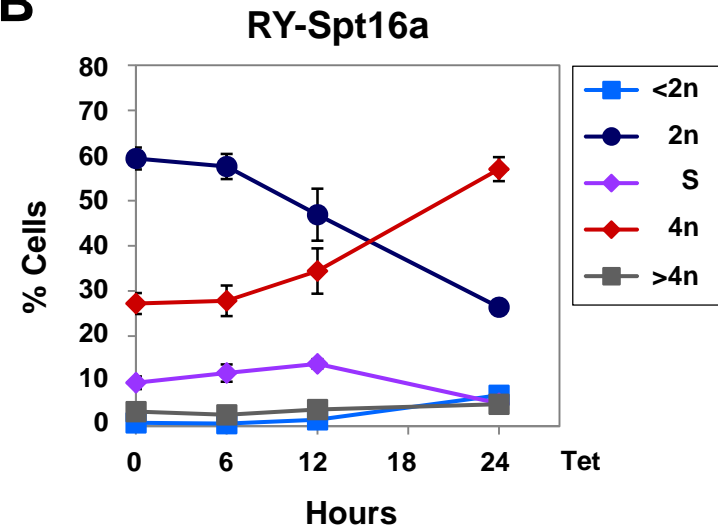**Spt16a**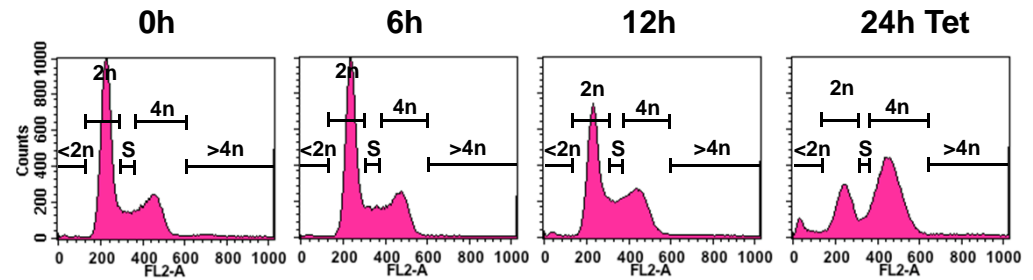**Sup Fig 10**

**Statistical significance:**

**Change in presence in mononucleosomal fraction after 24h vs 0h  
induction Spt16 RNAi:**

| <b>Probe</b>                   | <b>P value</b> | <b>Significant</b> |
|--------------------------------|----------------|--------------------|
| <b>Pur</b>                     | 0.0193         | Yes                |
| <b>GFP</b>                     | 0.0370         | Yes                |
| <b>VSG 221</b>                 | 0.3915         | No                 |
| <b>Blast</b>                   | 0.7728         | No                 |
| <b>VSG T3</b>                  | 0.6794         | No                 |
| <b>Procyclin</b>               | 0.3942         | No                 |
| <b>BCA (VSG118)</b>            | 0.5205         | No                 |
| <b>rDNA (d)</b>                | 0.9364         | No                 |
| <b>rDNA (n)</b>                | 0.9246         | No                 |
| <b>rDNA (p)</b>                | 0.6010         | No                 |
| <b>Pol I</b>                   | 0.3720         | No                 |
| <b><math>\alpha</math> Tub</b> | 0.1450         | No                 |
| <b><math>\gamma</math> Tub</b> | 0.4773         | No                 |
| <b>Actin</b>                   | 0.3122         | No                 |

Statistical analysis (t-test): Change in presence in nucleosomal fraction after 24 h vs 0 h induction Spt16 RNAi

| Probe                   | Mono    |             | Di      |             | Di/Tri  |             | Tri/Tetra |             | >Tetra  |             | undigested |             |
|-------------------------|---------|-------------|---------|-------------|---------|-------------|-----------|-------------|---------|-------------|------------|-------------|
|                         | P value | Significant | P value | Significant | P value | Significant | P value   | Significant | P value | Significant | P value    | Significant |
| <b>Pur</b>              | 0.0193  | Yes         | 0.3620  | No          | 0.4607  | No          | 0.8360    | No          | 0.8642  | No          | 0.1893     | No          |
| <b>GFP</b>              | 0.0370  | Yes         | 0.1854  | No          | 0.4659  | No          | 0.3565    | No          | 0.9318  | No          | 0.2122     | No          |
| <b>VSG 221</b>          | 0.3921  | No          | 0.8020  | No          | 0.8054  | No          | 0.4709    | No          | 0.6420  | No          | 0.6762     | No          |
| <b>Blast</b>            | 0.7726  | No          | 0.5819  | No          | 0.7074  | No          | 0.8171    | No          | 0.3228  | No          | 0.0150     | Yes         |
| <b>VSG T3</b>           | 0.6784  | No          | 0.2036  | No          | 0.7448  | No          | 0.4392    | No          | 0.5183  | No          | 0.7603     | No          |
| <b>Procyclin</b>        | 0.3937  | No          | 0.6823  | No          | 0.2742  | No          | 0.3041    | No          | 0.5974  | No          | 0.4429     | No          |
| <b>BCA<br/>(VSG118)</b> | 0.5191  | No          | 0.7685  | No          | 0.6120  | No          | 0.3015    | No          | 0.4647  | No          | 0.5767     | No          |
| <b>rDNA (d)</b>         | 0.9363  | No          | 0.1076  | No          | 0.3946  | No          | 0.2171    | No          | 0.1028  | No          | 0.9260     | No          |
| <b>rDNA (n)</b>         | 0.9253  | No          | 0.2408  | No          | 0.9211  | No          | 0.3057    | No          | 0.1417  | No          | 0.9677     | No          |
| <b>rDNA (p)</b>         | 0.6014  | No          | 0.3145  | No          | 0.7682  | No          | 0.3296    | No          | 0.1302  | No          | 0.8694     | No          |
| <b>Pol I</b>            | 0.3714  | No          | 0.9665  | No          | 0.3704  | No          | 0.0914    | No          | 0.5210  | No          | 0.3818     | No          |
| <b>α Tub</b>            | 0.1452  | No          | 0.8784  | No          | 0.4859  | No          | 0.2234    | No          | 0.3066  | No          | 0.3933     | No          |
| <b>γ Tub</b>            | 0.4766  | No          | 0.6136  | No          | 0.4121  | No          | 0.1729    | No          | 0.3037  | No          | 0.4712     | No          |
| <b>Actin</b>            | 0.3122  | No          | 0.6796  | No          | 0.4398  | No          | 0.2035    | No          | 0.2094  | No          | 0.4347     | No          |

**Statistical significance**

**Change in histone H3 ChIP after induction RNAi for 24 h vs 0 h**

| Probe        | RY - Spt16 |             | RY - Spt6 |             |
|--------------|------------|-------------|-----------|-------------|
|              | P value    | Significant | P value   | Significant |
| Pur          | 0.0134     | Yes         | 0.5041    | No          |
| GFP          | 0.0006     | Yes         | 0.7734    | No          |
| VSG 221      | 0.1283     | No          | 0.9144    | No          |
| Blast        | 0.1349     | No          | 0.4322    | No          |
| VSG T3       | 0.0076     | Yes         | 0.3555    | No          |
| Pol I        | 0.0017     | Yes         | 0.7626    | No          |
| $\alpha$ Tub | 0.0001     | Yes         | 0.7733    | No          |
| $\gamma$ Tub | 0.0069     | Yes         | 0.9554    | No          |
| Actin        | 0.0160     | Yes         | 0.8807    | No          |
| C a          | 0.0003     | Yes         | 0.3886    | No          |
| C b          | 0.0009     | Yes         | 0.3491    | No          |
| C c          | 0.0133     | Yes         | 0.9858    | No          |
| C d          | 0.0172     | Yes         | 0.9125    | No          |
| C e          | 0.0165     | Yes         | 0.2543    | No          |
| C f          | 0.0224     | Yes         | 0.1764    | No          |
| C g          | 0.0049     | Yes         | 0.9891    | No          |
| D a          | 0.0049     | Yes         | 0.9891    | No          |
| D b          | 0.0036     | Yes         | 0.1753    | No          |
| D c          | 0.0128     | Yes         | 0.1694    | No          |
| D d          | 0.0159     | Yes         | 0.2199    | No          |
| D e          | 0.0005     | Yes         | 0.2621    | No          |
| D f          | 0.0011     | Yes         | 0.3290    | No          |
| D g          | 0.0032     | Yes         | 0.9969    | No          |
| rDNA (b)     | 0.609      | No          | 0.8085    | No          |
| rDNA (c)     | 0.0520     | No          | 0.0596    | No          |
| rDNA (d)     | 0.0240     | Yes         | 0.1872    | No          |
| rDNA (n)     | 0.5103     | No          | 0.4949    | No          |
| rDNA (p)     | 0.5454     | No          | 0.7983    | No          |

**Statistical significance:**

**Change in histone H2A ChIP after induction RNAi for 24 h vs 0 h**

| Probe        | RY - Spt16 |             | RY - Spt6 |             |
|--------------|------------|-------------|-----------|-------------|
|              | P value    | Significant | P value   | Significant |
| Pur          | 0.0359     | Yes         | 0.0625    | No          |
| GFP          | 0.0363     | Yes         | 0.0993    | No          |
| VSG 221      | 0.5192     | No          | 0.1835    | No          |
| Blast        | 0.2904     | No          | 0.6516    | No          |
| VSG T3       | 0.9590     | No          | 0.0105    | Yes         |
| Pol I        | 0.0636     | No          | 0.4313    | No          |
| $\alpha$ Tub | 0.1289     | No          | 0.5953    | No          |
| $\gamma$ Tub | 0.2007     | No          | 0.4374    | No          |
| Actin        | 0.0235     | Yes         | 0.4660    | No          |
| C a          | 0.0441     | Yes         | 0.8683    | No          |
| C b          | 0.1031     | No          | 0.1351    | No          |
| C c          | 0.1195     | No          | 0.5253    | No          |
| C d          | 0.1809     | No          | 0.3817    | No          |
| C e          | 0.0315     | Yes         | 0.6819    | No          |
| C f          | 0.2576     | No          | 0.2521    | No          |
| C g          | 0.0982     | No          | 0.3575    | No          |
| D a          | 0.1381     | No          | 0.3575    | No          |
| D b          | 0.0004     | Yes         | 0.0203    | Yes         |
| D c          | 0.0001     | Yes         | 0.1295    | No          |
| D d          | 0.0219     | Yes         | 0.0192    | Yes         |
| D e          | 0.0193     | Yes         | 0.5365    | No          |
| D f          | 0.0225     | Yes         | 0.3611    | No          |
| D g          | 0.0745     | No          | 0.1604    | No          |
| rDNA (b)     | 0.5816     | No          | 0.8200    | No          |
| rDNA (c)     | 0.2819     | No          | 0.0661    | No          |
| rDNA (d)     | 0.9480     | No          | 0.0722    | No          |
| rDNA (n)     | 0.4252     | No          | 0.1801    | No          |
| rDNA (p)     | 0.4974     | No          | 0.4052    | No          |

**Statistical significance:**

**Change in levels rRNA precursor transcripts after induction Spt16 RNAi**

| <b>Probe</b>                                | <b>(h) RNAi</b> | <b>P value</b> | <b>Significant</b> |
|---------------------------------------------|-----------------|----------------|--------------------|
| <b>rDNA pc1</b>                             | 12 vs 0         | 0.3380         | No                 |
|                                             | 24 vs 0         | 0.9542         | No                 |
| <b>rDNA pc2</b>                             | 12 vs 0         | 0.0699         | No                 |
|                                             | 24 vs 0         | 0.0248         | Yes                |
| <b>rDNA pc2 and 3</b>                       | 12 vs 0         | 0.0546         | No                 |
|                                             | 24 vs 0         | 0.0145         | Yes                |
| <b><math>\alpha/\beta</math> Tubulin pc</b> | 12 vs 0         | 0.0153         | Yes                |
|                                             | 24 vs 0         | 0.0389         | Yes                |

**Sup. Table 5**

**Statistical significance:**

**Li-Cor Western analysis of change in histone levels:**

| <b>Probe</b> | <b>P value: RY vs</b> |                      |                       |                        |
|--------------|-----------------------|----------------------|-----------------------|------------------------|
|              | <b>CYC6 – no Tet</b>  | <b>CYC6 – 9h Tet</b> | <b>Spt16 – no Tet</b> | <b>Spt16 – 24h Tet</b> |
| <b>H1</b>    | 0.1977                | 0.0715               | 0.4705                | 0.1615                 |
| <b>H2A</b>   | 0.8305                | 0.8795               | 0.7830                | 0.6340                 |
| <b>H3</b>    | 0.6041                | 0.7442               | 0.9620                | 0.3732                 |
| <b>BiP</b>   | 0.9980                | 0.7675               | 0.8826                | 0.9274                 |

---

**Sup. Table 6**



**Table of primer pairs used for qPCR:**

| <b>Fig.</b>   | <b>Primer Pair</b> | <b>Forward Primer</b> | <b>Sequence (5' → 3')</b> | <b>Reverse Primer</b> | <b>Sequence (5' → 3')</b> |
|---------------|--------------------|-----------------------|---------------------------|-----------------------|---------------------------|
| <b>1</b>      | Pob3               | Pob3_1243s            | attgaagttgatgagtcggaac    | Pob3_1343as           | ccgtgataggaagtgaagcaa     |
| <b>2-4</b>    | Pur                | Puromycin_288s        | cgagttgagcggttcc          | Puromycin_333as       | gccttccatctgttgc          |
|               | GFP                | eGFP_184s             | gtgaccaccctgacctac        | eGFP_324as            | ctgtagtgtccgctgc          |
|               | VSG221             | VSG221_46s            | ctagcccaagttctccaattc     | VSG221_207as          | cctcattttctggatttgc       |
|               | Blast              | Blasticidin_213s      | caacctgactgtatcgctc       | Blasticidin_337a      | catcactgtcctcactatg       |
|               | VSG T3             | VSGT3_675s            | aaacgacgcaacctctatc       | VSGT3_904as           | ctatgtctctgggcttga        |
|               | Procyclin          | Procyclin_8s          | ctcgttccctttatctactc      | Procyclin_102as       | cttgtctctgtgctctc         |
|               | VSG118             | VSGBCA118_108s        | ctgcaagatgtctaaggaac      | VSGBCA118_193as       | caagttctaggatcctcgta      |
|               | rDNA d             | 18S_117s              | gcattactggataacttg        | 18S_250as             | gttctaatttcattcattcg      |
|               | rDNA n             | 28Sa_up_136s          | aaagaggcggcgatagtg        | 28Sa_up_52as          | acgaaagaagcacaagcacata    |
|               | rDNA p             | 140srRNA_up_89s       | ttgtgttctatgtgtgtgtaag    | 140srRNA_1as          | cgtttgagagggacaaaatat     |
|               | Pol I              | Poll 349 s            | acttatatgccagacgaagtgg    | Poll 486 as           | tgtgaatctctgggaagttgc     |
|               | αTub               | alphaTub 56s          | cctgctgggaattgttctg       | alphaTub 169as        | cagtctcagagaagaaggtgtc    |
|               | γTub               | GammaTub_491s         | aatcacctgatttggacacaag    | GammaTub_583s         | gtttgagtgttgcgtgaaagag    |
|               | Actin              | Actin_1031s           | gttccatcctctcatcacta      | Actin_1091as          | tcgtattcactctcgttatc      |
| <b>S2</b>     | Spt6               | Spt6_qPCR_417s        | gatacaccggaatgatgctcta    | Spt6_qPCR_536as       | gtttcttcacggagacctacac    |
| <b>S4, S5</b> | a                  | rDNAspacer_178s       | atfttctctaccctctctt       | rDNAspacer_323as      | atcatcgatcatfttctc        |
|               | b                  | rDNAProm_333s         | gtcaatacaacacacaatagg     | rDNAProm_610as        | cttaactgaggaagtgtcata     |
|               | c                  | rDNAProm_938s         | ataaaagggagttatagcgt      | rDNAProm_1048as       | gtacaacacaatccgttaag      |
|               | d                  | 18S_117s              | gcattactggataacttg        | 18S_250as             | gttctaatttcattcattcg      |
|               | e                  | 18S_1965s             | gaatcacgtagaccactt        | 18S_2060as            | gtaatcggcacagtttgc        |
|               | f                  | 5.8S_36s              | ggatgacttggtctctat        | 5.8S_95as             | attgataccacttatcgact      |
|               | g                  | 28Salpha_226s         | acacatttacaaccttcat       | 28Salpha_410as        | ctatcggcttctctactctat     |
|               | h                  | 28Salpha_1737s        | ttgttaggaaagtgaaggt       | 28Salpha_1840as       | aatatcatcccagggtctc       |
|               | i                  | 28Sbeta_103s          | gtaagtcgcaagaagcat        | 28Sbeta_292as         | accagaaggaggttagtagata    |
|               | j                  | 28Sbeta_1143s         | gtaaagcttctgtgatta        | 28Sbeta_1253as        | tgacacctctggtatgatt       |
|               | k                  | rDNASp_27s            | tatgtgtatgtgtgtgtgta      | rDNASp_108as          | atgcaaaataggagactaca      |
|               | m                  | 18S_up_377s           | ccatgctctctcgtgtgtgta     | 18S_up_265as          | ttcctaaggcgtcactctatc     |
|               | n                  | 28Sa_up_136s          | aaagaggcggcgatagtg        | 28Sa_up_52as          | acgaaagaagcacaagcacata    |
|               | p                  | 140srRNA_up_89s       | ttgtgttctatgtgtgtgtaag    | 140srRNA_1as          | cgtttgagagggacaaaatat     |
| <b>S7</b>     | α/β prec.          | aTub_up_331s          | gaggagggtggaagggtatag     | aTub_up_205as         | gaaggcgtgttgatgagttga     |
| <b>S8</b>     | CYC6               | Cyc6_699s             | gccggttcccttcattgttc      | Cyc6_811as            | gcatttgtctgttgagattg      |

**Sup. Table 7**

1 **Figure legends supplementary figures**

2 **Sup. Fig. 1**

3 Proteins found to interact with the FACT Spt16 large subunit using tandem affinity  
4 purification and subsequent mass spectrometry. A list of proteins with significant matches  
5 arranged according to their highest score as determined by mass spectrometry of bands  
6 isolated from SDS-PAGE gels. Only the FACT small subunit Pob3 was considered a  
7 significant interaction partner.

8

9 **Sup. Fig. 2**

10 The putative histone chaperone Spt6 is essential in bloodstream form *T. brucei*.

11 A. Comparison of *S. cerevisiae* Spt6 with the *T. brucei* orthologue, which was found by  
12 BLAST using the TriTrypDB, version 6.0 database. For *T. brucei* 427 the e-value is  $4.1e^{-07}$   
13 and for *T. brucei* 927 the e-value is:  $3.2e^{-07}$ . Of the multiple domains present in Spt6 in *S.*  
14 *cerevisiae* and higher eukaryotes, only the YqgFc (PF14639) and the SH2 (PF14633)  
15 domains are conserved in the *T. brucei* orthologue, as annotated by InterProScan5.

16 B. Reduction in Spt6 transcript in *T. brucei* RY-Spt6b after induction of Spt6 RNAi with  
17 tetracycline as analysed via qPCR. The relative change in transcript levels is plotted against  
18 time induction with tetracycline (Tet). The mean of three independent experiments is shown  
19 with the standard deviation indicated with error bars.

20 C. Spt6 is essential in bloodstream form *T. brucei*. The graph shows the growth of the *T.*  
21 *brucei* RY-Spt6a and RY-Spt6b cell lines in the presence (+) or absence (-) of tetracycline to  
22 induce Spt6 RNAi compared with the parental RY strain. The mean of three measurements is  
23 shown with the standard deviation indicated with error bars.

24

25

26

27 **Sup. Fig. 3**

28 Depletion of Spt16 disrupts higher order nucleosome structure, resulting in an increase in  
29 mononucleosomes at the silent VSG ES.

30 A. Ethidium bromide stained gels showing nucleosome fractions after digestion of genomic DNA  
31 (gDNA) with micrococcal nuclease (MNase) and fractionation over a sucrose gradient. *T. brucei* RY-  
32 Spt16 cells were grown for 24 hours in the absence (-) or presence (+) of tetracycline (Tet) to  
33 knockdown Spt16. An equal number of cells for both samples was subjected to MNase digestion,  
34 before separating the resulting nucleosome fractions by centrifugation over a sucrose gradient. DNA  
35 of each fraction was isolated by phenol/ chloroform extraction and subjected to gel electrophoresis.  
36 The total input (In) is shown, followed by fractions 8 to 24 (top to bottom). Fractions 1 to 7 contained  
37 very little DNA and are therefore not shown. For further analysis, fractions of RY-Spt16 (-Tet) or  
38 RY-Spt16 (+Tet) DNA containing similar species of nucleosomes were pooled as indicated into  
39 mono-, di-, di/tri-, tri/tetra-, and >tetranucleosome containing fractions.

40 B. Knockdown of Spt16 results in increased MNase sensitivity (increased abundance of  
41 mononucleosomes) specifically at the silent VSG ES promoter. The amount of each nucleosome-  
42 fraction (percentage total digested DNA) in RY-Spt16 cells (-Tet versus +Tet) as shown in Sup. Fig.  
43 3A is shown. Quantitative PCR (qPCR) with primers specific to the active *VSG T3* or the silent *VSG*  
44 *221* ES was used to determine the abundance of specific genomic loci within the respective fractions.  
45 In order to adjust for the different amount of gDNA derived from the same number of cells before and  
46 after knockdown of Spt16 (due to the G2/M cell cycle arrest), the percentage of each pooled fraction  
47 from total ( $\Sigma$  (mono + di + di/tri + tri/tetra + >tetra + bottom fraction) = 100%) in RY-Spt16 (-Tet) or  
48 (+Tet) was determined, before being plotted as percentage according to Povelones *et al* (2012). The  
49 results are the mean of three independent experiments, with the standard deviation indicated with  
50 error bars. Significance was determined by a Student's t-test (unpaired, two-tailed), and indicated with  
51 an asterisk (p=0.01-0.05). All obtained p-values are listed in Supplementary Table 2.

52

53

54 **Sup. Fig. 4**

55 Depletion of Spt16 does not significantly affect chromatin structure at Pol II and non-ES Pol I  
56 transcription units, showing only a trend to increasing tri- and tetra- nucleosomes.

57 The percentage of each nucleosome fraction in the total digested gDNA of RY-Spt16 cells (-Tet  
58 versus +Tet) as indicated in Sup. Fig. 3A is shown. Quantitative PCR (qPCR) with primers specific  
59 for silent and active Pol I transcription units (as illustrated in Fig. 3C), as well as Pol II transcription  
60 units, was used to determine the abundance of those genomic loci within the respective fractions. In  
61 order to adjust for the different amounts of gDNA obtained from the same number of cells before and  
62 after knockdown of Spt16 (due to the G2/M cell cycle arrest), the percentage of each pooled fraction  
63 from total ( $\Sigma$  (mono + di + di/tri + tri/tetra + >tetra + bottom fraction) = 100%) in RY-Spt16 (-Tet or  
64 +Tet) was determined, before being plotted as a percentage of total according to Povelones *et al*  
65 (2012). The results are the mean of three independent experiments, with the standard deviation  
66 indicated with error bars. Significance was determined by a Student's t-test (unpaired, two-tailed).  
67 All obtained p-values are listed in Supplementary Table 2.

68

69 **Sup. Fig. 5**

70 The FACT large subunit Spt16 is relatively depleted at the Pol I rDNA promoter, but  
71 is evenly distributed across the Pol II convergent and divergent strand switch regions (SSRs).

72 A. Schematic of a *T. brucei* rDNA transcription unit. The rRNA genes are shown as filled  
73 boxes and the promoter with a flag. The regions used for qPCR are indicated with lettered  
74 bars. The bar graph shows quantitation of CHIP experiments performed with a cell line  
75 containing myc-tagged Spt16 compared with the parental cell line (wild type or WT). The  
76 amount of Spt16 found binding to the rDNA locus was determined using qPCR. The mean of  
77 two independent experiments is shown.

78 B. The schematics show a representative Pol II convergent and divergent SSR (C2 and D1 of  
79 chromosome 10) with qPCR primers indicated with lettered dots as in (Stanne *et al.*, 2011).

80 The bar graphs show quantitation of the ChIP of myc-tagged Spt16 binding to various loci in  
81 comparison with a ChIP performed with the wild type strain, plotted as percentage of the total  
82 input. The mean of two independent experiments is shown.

83

#### 84 **Sup. Fig. 6**

85 Depletion of Spt16 results in a reduction in rRNA precursor transcripts and an  
86 increase in histone abundance at the rDNA.

87 A. Schematic of a *T. brucei* rDNA transcription unit. The rRNA genes are shown as filled  
88 boxes, and the promoter with a flag. The regions used for qPCR analysis are indicated with  
89 lettered bars. Three rRNA precursor transcripts are indicated below as described in (White *et*  
90 *al.*, 1986).

91 B. Significant decrease in rRNA precursor transcripts from the 3' end of the rDNA  
92 transcription unit. The fold change in rRNA precursors as determined by qPCR is plotted  
93 through time after induction of Spt16 RNAi using tetracycline (Tet). Precursor 1 (pre 1) was  
94 detected with primer pair 'm', precursor 2 with primer pair 'n' and precursors 2 and 3 with  
95 primer pair 'p'. The mean of three independent experiments is shown with the standard  
96 deviation indicated with error bars. Significance was determined using a Student's t-test  
97 (unpaired, two-tailed) with significant: \* (p=0.01-0.05) indicated.

98 C. Increase in histone H3 at the rDNA after depletion of the FACT large subunit Spt16. The  
99 bar graphs show the abundance of histones H3 and H2A as determined by ChIP and  
100 subsequent qPCR analysis using the primers indicated in panel A. The ChIP results were  
101 obtained in the presence (+) or absence (-) of Spt16 RNAi for 24 hours. The results are  
102 shown as the mean of three independent experiments with the standard deviation indicated  
103 with error bars. The statistical significance was determined using a Student's t-test (unpaired,  
104 two-tailed).

105 D. No significant change in histone H3 and H2A distribution after knockdown of the  
106 putative histone chaperone Spt6. Further the experiments in this panel are as described in  
107 panel C.

108

109 **Sup. Fig. 7**

110 Decrease in Pol II precursor transcripts after depletion of Spt16.

111 A. Schematic of the *T. brucei* tubulin array comprising alternating  $\alpha$ - and  $\beta$ - tubulin genes.  
112 The intergenic regions used to assess levels of tubulin precursor transcript are indicated with  
113 black bars.

114 B. Decrease in tubulin precursor transcript ( $\alpha/ \beta$  pre) after induction of Spt16 RNAi with  
115 tetracycline (Tet) for the time indicated. The mean of three independent experiments is  
116 shown with the standard deviation indicated with error bars. Statistical significance was  
117 determined with significant: \* ( $p=0.01-0.05$ ) indicated.

118

119 **Sup. Fig. 8**

120 There is no significant change in levels of histone H3 or H2A at or around Pol II  
121 transcription units after depletion of Spt6.

122 The relative abundance of histones H3 and H2A was determined at Pol II  
123 transcription units and strand switch regions (SSR) after Spt6 knockdown. Convergent  
124 regions contain putative Pol II terminators and divergent regions putative promoters. Histone  
125 ChIP material was analysed by qPCR. The schematics show Pol II convergent and divergent  
126 SSRs (C2 and D1 of chromosome 10) with qPCR primers used for analysis indicated with  
127 lettered dots as in (Stanne et al., 2011). The bar graphs show histone H3 or H2A levels in the  
128 *T. brucei* RY-Spt6 strain in the presence (+) or absence (-) of tetracycline for 24 hours to  
129 induce Spt6 RNAi. The Pol II transcription units analysed include the large subunit of RNA

130 polymerase I (Pol I),  $\alpha$ -tubulin (tub),  $\gamma$ -tubulin and actin, as well as the Pol II transcription  
131 units around the depicted SSRs. Results are the mean of three independent experiments, with  
132 the standard deviation indicated with error bars. Statistical significance was determined with  
133 significant: \* (p=0.01-0.05) indicated.

134

### 135 **Sup. Fig. 9**

136 Depletion of Cyclin 6 is lethal in bloodstream form *T. brucei* and results in a cell  
137 cycle arrest with an accumulation of 1N2K cells.

138 A. Cyclin 6 is essential in bloodstream form *T. brucei*. The growth of the *T. brucei* RY-  
139 Cyc6a and RY-Cyc6b strains in the presence (+) or absence (-) of tetracycline to induce Cyc6  
140 RNAi is compared with the parental RY strain. The mean of three measurements is shown  
141 with the standard deviation indicated with error bars.

142 B. Cell cycle analysis using the DNA stain DAPI after the induction of Cyc6 RNAi with  
143 tetracycline (Tet) for the time in hours (h) indicated. The percentage of cells (n~300) with  
144 different numbers of nuclei (N) or kinetoplasts (K) is indicated. The mean of three  
145 independent experiments is shown with the standard deviation indicated with error bars.

146 C. Reduction in cyclin 6 transcript as determined by qPCR after the induction of Cyc6 RNAi  
147 using tetracycline (Tet) for the indicated time.

148

### 149 **Sup. Fig. 10**

150 Depletion of Cyclin 6 as well as Spt16 results in cell cycle arrest at G2/ M.

151 A. Accumulation of cells in the G2/ M cell cycle phase (4n DNA content) after induction of  
152 Cyc6 RNAi using tetracycline (Tet). Cells were stained with propidium iodide, and DNA  
153 content determined in the FL2 channel using flow cytometry (representative experiment  
154 shown). The relevant gates used for quantitation are indicated with brackets. The graph

155 shows the mean of three independent experiments with standard deviation indicated with  
156 error bars.

157 B. Knockdown of Spt16 also results in an accumulation of cells in the G2/ M cell cycle  
158 stage. The experiments in this panel are further as described above.
